# Supplementary material for: Synthesis and molecular structure of an abnormal carbene–gallium chloride complex
Source: Royal Society of Chemistry journal article supplement (doi:10.1039/c4dt00933a), 2014-01-01
Supplement: c4dt00933a1.pdf [file c4dt00933a1.pdf]

## **SUPPORTING INFORMATION of SYNTHESSES and STRUCTURES**

### **Synthesis and Molecular Structure of an Abnormal Carbene-Gallium Chloride Complex**

*Mingwei Chen, Yuzhong Wang, Robert J. Gilliard,  
Pingrong Wei, Nichole A. Schwartz and Gregory H. Robinson\**

*Department of Chemistry, The University of Georgia, Athens, Georgia 30602-2556, United States*

To whom correspondence should be addressed. Email: [robinson@uga.edu](mailto:robinson@uga.edu)

All reactions were performed under purified argon using Schlenk techniques and an inert atmosphere drybox (M-Braun LabMaster 130). Chemicals were purchased from commercial sources and used as received. Solvents were dried and distilled under argon from Na/benzophenone prior to use. N-heterocyclic carbene NHC (NHC = :C{N(2,6-Pr<sup>i</sup><sub>2</sub>C<sub>6</sub>H<sub>3</sub>)CH<sub>2</sub>})<sub>2</sub>) and compound **2** was prepared according to the literature method.<sup>1,2</sup> <sup>1</sup>H and <sup>13</sup>C NMR spectra were recorded on a Varian Mercury Plus 400 MHz spectrometer. <sup>11</sup>B NMR spectra were recorded on a Varian Unity Inova 500 MHz spectrometer. X-ray intensity data for compound **4**, **5**·THF and **6**·(toluene)<sub>0.5</sub> were collected on a Bruker SMART APEX II X-ray diffractometer system with graphite-monochromated Mo K $\alpha$  radiation ( $\lambda = 0.71073 \text{ \AA}$ ), using the  $\omega$ -scan technique.

Compound **4**: NHC:BEt<sub>3</sub> (NHC = :C{N(2,6-Pr<sup>i</sup><sub>2</sub>C<sub>6</sub>H<sub>3</sub>)CH<sub>2</sub>})<sub>2</sub>) was prepared similarly according to the literature method reported for the synthesis of NHC:BH<sub>3</sub><sup>3</sup>: to a slurry of NHC carbene (10.0g, 25.732 mmol) in hexane (120 mL) was added BEt<sub>3</sub> (2.6g, 26.532 mmol) at ambient temperature. The mixture was stirred over one day and then the solution was filtered. The residue of NHC:BEt<sub>3</sub> was obtained after the volatiles were removed in vacuo. To a solution of L:BEt<sub>3</sub> (5.0g, 10.275 mmol) in THF (50 mL) was added 6.5 mL of nBuLi solution (1.6M, 10.4 mmol) at -78 °C. The mixture was allowed to warm to room temperature over night and the solvent was then removed in vacuo. The residue was recrystallized in THF giving X-ray quality colorless crystals of **4** (7.1g, 98% yield) at ambient temperature. Mp: gradually decomposed at 303 °C and melt at 311 °C. <sup>1</sup>H NMR (THF-d<sub>8</sub>):  $\delta = 0.16$  [q, 6H, B(CH<sub>2</sub>CH<sub>3</sub>)<sub>3</sub>], 0.46 [t, 9H, B(CH<sub>2</sub>CH<sub>3</sub>)<sub>3</sub>], 1.08 [d, 6H, CH(CH<sub>3</sub>)<sub>2</sub>], 1.13 [d, 6H, CH(CH<sub>3</sub>)<sub>2</sub>], 1.30 [d, 12H, CH(CH<sub>3</sub>)<sub>2</sub>], 2.97 [m, 4H, CH(CH<sub>3</sub>)<sub>2</sub>], 6.08 (s, 1H, CH), 7.09-7.28 (m, 6H, Ar-H). <sup>13</sup>C NMR (C<sub>6</sub>D<sub>6</sub>):  $\delta = 13.4$  [BCH<sub>2</sub>CH<sub>3</sub>], 23.5 [BCH<sub>2</sub>CH<sub>3</sub>], 23.8 [CH(CH<sub>3</sub>)<sub>2</sub>], 24.1 [CH(CH<sub>3</sub>)<sub>2</sub>], 26.5 [CH(CH<sub>3</sub>)<sub>2</sub>], 27.2 [CH(CH<sub>3</sub>)<sub>2</sub>], 27.4 [CH(CH<sub>3</sub>)<sub>2</sub>], 28.1 [CH(CH<sub>3</sub>)<sub>2</sub>], 29.9 [CH(CH<sub>3</sub>)<sub>2</sub>], 30.0 [CH(CH<sub>3</sub>)<sub>2</sub>], 132.4 (LiCCN), 141.1 (NCCH), 123.7, 124.0, 128.0, 129.3, 146.7, 147.0, 147.9 (Ar-C), 207.2 (NCHN). <sup>11</sup>B NMR (THF-d<sub>8</sub>, 160.35 MHz):  $\delta = -13.85$ . Anal. Calc. for **4** (C<sub>45</sub>H<sub>74</sub>N<sub>2</sub>O<sub>3</sub>BLi): C, 76.25; H, 10.52; N, 3.95; Found: C, 76.19; H, 10.38; N, 4.06. Crystal data for **4**: C<sub>45</sub>H<sub>74</sub>N<sub>2</sub>O<sub>3</sub>BLi, fw = 708.81, orthorhombic, *Pca21* (No. 29), *a* = 23.735(2) Å, *b* = 10.4695(10) Å, *c* = 18.5654(17) Å,  $\alpha = 90^\circ$ ,  $\beta = 90^\circ$ ,  $\gamma = 90^\circ$ , *V* = 4613.4(7) Å<sup>3</sup>, *Z* = 4, R1 = 0.0584 for 8405 data (*I* > 2 $\sigma$ (*I*)), wR<sub>2</sub> = 0.1268 (all data).

Compound **5**: To a solution of GaCl<sub>3</sub> (0.3g, 1.704mmol) in THF (20 mL) was slowly added a solution of compound **4** (1.2g, 1.693mmol) in THF (20 mL) at -78 °C. The mixture was allowed to warm to room temperature over night and then the solvent was removed in vacuo. The residue was recrystallized in mixture of THF/hexane giving X-ray quality colorless crystals of **5** (0.72g, 67% yield). Mp: gradually decomposed and melt at 140 °C. <sup>1</sup>H NMR (THF-d<sub>8</sub>):  $\delta = 1.11$  [d, 6H, CH(CH<sub>3</sub>)<sub>2</sub>], 1.21 [d, 6H, CH(CH<sub>3</sub>)<sub>2</sub>], 1.29

[d, 6H, CH(CH<sub>3</sub>)<sub>2</sub>], 2.50 (m, 2H, CH(CH<sub>3</sub>)<sub>2</sub>), 2.62 [m, 2H, CH(CH<sub>3</sub>)<sub>2</sub>], 7.34 (d, 2H, Ar-H), 7.42 (d, 2H, Ar-H), 7.50 (t, 1H, Ar-H), 7.57 (t, 1H, Ar-H), 7.91 (s, 1H, C=CH), 9.51 (s, 1H, NCHN). <sup>13</sup>C NMR (THF-d<sub>8</sub>): δ = 23.5 [CH(CH<sub>3</sub>)<sub>2</sub>], 24.9 [CH(CH<sub>3</sub>)<sub>2</sub>], 25.7 [CH(CH<sub>3</sub>)<sub>2</sub>], 26.5 [CH(CH<sub>3</sub>)<sub>2</sub>], 27.2 [CH(CH<sub>3</sub>)<sub>2</sub>], 27.4 [CH(CH<sub>3</sub>)<sub>2</sub>], 30.5 [CH(CH<sub>3</sub>)<sub>2</sub>], 30.6 [CH(CH<sub>3</sub>)<sub>2</sub>], 134.1 (GaCCN), 142.3 (NCCH), 125.6, 126.2, 132.4, 132.9, 133.2, 134.0, 147.2, 147.4 (Ar), 207.2 (NCHN). Anal. Calc. for **5**·THF (C<sub>31</sub>H<sub>44</sub>N<sub>2</sub>OGaCl<sub>3</sub>): C, 58.47; H, 6.97; N, 4.40; Found: C, 58.39; H, 7.06; N, 4.36. Crystal data for **5**·THF: C<sub>31</sub>H<sub>44</sub>N<sub>2</sub>OGaCl<sub>3</sub>, fw = 636.75, Orthorhombic, *Pbca* (No. 61), *a* = 11.4236(6) Å, *b* = 20.7234(11) Å, *c* = 29.0681(16) Å, *V* = 6881.5(6) Å<sup>3</sup>, *Z* = 8, *R*<sub>1</sub> = 0.0470 for 7085 data (*I* > 2σ(*I*)), *wR*<sub>2</sub> = 0.1181 (all data).

Compound **6**: To a solution of GaCl<sub>3</sub> (0.323g, 1.835mmol) in THF (10 mL) was slowly added a solution of compound **2** (0.9g, 1.829mmol) in THF (30 mL) at -78 °C. The mixture was allowed to warm to room temperature over night and then the solvent was removed in vacuo. The residue was extracted using 30 mL of toluene. The filtrate was concentrated to ca. 5 mL in vacuo, to which 5 mL of hexane was then added. X-ray quality colorless crystals of **6** were observed over 5 days (0.78g, 76% yield). Mp: gradually decomposed and melt at 224 °C. <sup>1</sup>H NMR (C<sub>6</sub>D<sub>6</sub>): δ = 0.73 [t, 6H, B(CH<sub>2</sub>CH<sub>3</sub>)<sub>2</sub>], 0.86 [q, 4H, B(CH<sub>2</sub>CH<sub>3</sub>)<sub>2</sub>], 0.93 [t, 12H, CH(CH<sub>3</sub>)<sub>2</sub>], 1.47 [t, 12H, CH(CH<sub>3</sub>)<sub>2</sub>], 2.66 [m, 2H, CH(CH<sub>3</sub>)<sub>2</sub>], 2.82 [m, 2H, CH(CH<sub>3</sub>)<sub>2</sub>], 7.08-7.29 (m, 6H, Ar-H), 7.45 (s, 1H, CH). <sup>13</sup>C NMR (C<sub>6</sub>D<sub>6</sub>): δ = 8.2 [BCH<sub>2</sub>CH<sub>3</sub>], 22.1 [BCH<sub>2</sub>CH<sub>3</sub>], 23.9 [CH(CH<sub>3</sub>)<sub>2</sub>], 24.2 [CH(CH<sub>3</sub>)<sub>2</sub>], 25.3 [CH(CH<sub>3</sub>)<sub>2</sub>], 25.8 [CH(CH<sub>3</sub>)<sub>2</sub>], 28.8 [CH(CH<sub>3</sub>)<sub>2</sub>], 29.1 [CH(CH<sub>3</sub>)<sub>2</sub>], 67.5 (BCCN), 137.9 (NCCH), 124.2, 124.5, 131.3, 131.4, 144.9, 145.4 (Ar-C). <sup>11</sup>B NMR (C<sub>6</sub>D<sub>6</sub>, 160.35 MHz): δ = -14.75. Crystal data for **6**·(toluene)<sub>0.5</sub>: C<sub>69</sub>H<sub>98</sub>N<sub>4</sub>B<sub>2</sub>Ga<sub>2</sub>Cl<sub>6</sub>, fw = 1357.27, Monoclinic, *P2(1)/c* (No. 14), *a* = 9.4189(15)Å, *b* = 20.580(3)Å, *c* = 19.841(3)Å, α = 90°, β = 102.730(3)°, γ = 90°, *V* = 3751.4(10)Å<sup>3</sup>, *Z* = 2, *R*<sub>1</sub> = 0.0602 for 7389 data (*I* > 2σ(*I*)), *wR*<sub>2</sub> = 0.1940 (all data).

#### Reference:

1. Arduengo, A. J., III; Krafczyk, R.; Schmutzler, R.; Craig, H. A.; Goerlich, J. R.; Marshall, W. J.; Unverzagt, M. *Tetrahedron* **1999**, *55*, 14523.
2. Wang, Y.; Xie, Y.; Abraham, M.Y.; Gilliard, R.J.; Wei, P.; Campana, C.F.; Schaefer, H.F.; Schaefer, P.v. R.; Robinson, G.H., *J. Am. Chem. Soc.* **2010**, *132*, 14370.
3. Wang, Y.; Quillian, B.; Wei, P.; Wannere, C. S.; Xie, Y.; King, R. B.; Schaefer III, H. F.; Schleyer, P. v. R.; Robinson, G. H., *J. Am. Chem. Soc.* **2007**, *129*, 12412.

## SUPPORTING INFORMATION OF X-RAY

**Table 1. Crystallographic Data for Compounds 4, 5 and 6.**

| Compound                                     | 4                                                                 | 5·THF                                                             | 6·(toluene) <sub>0.5</sub>                                                                      |
|----------------------------------------------|-------------------------------------------------------------------|-------------------------------------------------------------------|-------------------------------------------------------------------------------------------------|
| Empirical formula                            | C <sub>45</sub> H <sub>74</sub> N <sub>2</sub> O <sub>3</sub> BLi | C <sub>31</sub> H <sub>44</sub> N <sub>2</sub> OGaCl <sub>3</sub> | C <sub>34.5</sub> H <sub>49</sub> N <sub>2</sub> B <sub>1</sub> Ga <sub>1</sub> Cl <sub>3</sub> |
| Formula weight                               | 708.81                                                            | 636.75                                                            | 678.63                                                                                          |
| Crystal system                               | Orthorhombic                                                      | Orthorhombic                                                      | Monoclinic                                                                                      |
| Lattice parameters                           |                                                                   |                                                                   |                                                                                                 |
| a (Å)                                        | 23.735(2)                                                         | 11.4236(6)                                                        | 9.4189(15)                                                                                      |
| b (Å)                                        | 10.4695(10)                                                       | 20.7234(11)                                                       | 20.580(3)                                                                                       |
| c (Å)                                        | 18.5654(17)                                                       | 29.0681(16)                                                       | 19.841(3)                                                                                       |
| α (deg)                                      | 90                                                                | 90                                                                | 90                                                                                              |
| β (deg)                                      | 90                                                                | 90                                                                | 102.730(3)                                                                                      |
| γ (deg)                                      | 90                                                                | 90                                                                | 90                                                                                              |
| V (Å <sup>3</sup> )                          | 4613.4(7)                                                         | 6881.5(6)                                                         | 3751.4(10)                                                                                      |
| Space group                                  | Pca2(1)                                                           | Pbca                                                              | P21/c                                                                                           |
| Z value                                      | 4                                                                 | 8                                                                 | 2                                                                                               |
| ρ <sub>calc</sub> (g / cm <sup>3</sup> )     | 1.020                                                             | 1.229                                                             | 1.202                                                                                           |
| μ (Mo Kα) (mm <sup>-1</sup> )                | 0.061                                                             | 1.057                                                             | 0.971                                                                                           |
| Temperature (K)                              | 296(2)                                                            | 296(2)                                                            | 296(2)                                                                                          |
| 2Θ <sub>max</sub> (°)                        | 50.496                                                            | 52.896                                                            | 52.044                                                                                          |
| No. Obs. (I > 2σ(I))                         | 8405                                                              | 7085                                                              | 7389                                                                                            |
| No. Parameters                               | 662                                                               | 347                                                               | 431                                                                                             |
| Goodness of fit (GOF)                        | 1.018                                                             | 1.016                                                             | 1.055                                                                                           |
| Max. shift in cycle                          | 0.001                                                             | 0.001                                                             | 0.001                                                                                           |
| Residuals*: R1; wR2                          | 0.0584; 0.1268                                                    | 0.0470; 0.1181                                                    | 0.0602; 0.1670                                                                                  |
| Absorption Correction,                       | Multi-scan                                                        | Multi-scan                                                        | Multi-scan                                                                                      |
| Max/min                                      | 0.7454 / 0.6819                                                   | 0.7454 / 0.6288                                                   | 0.7454 / 0.5911                                                                                 |
| Largest peak in Final                        |                                                                   |                                                                   |                                                                                                 |
| Diff. Map (e <sup>-</sup> / Å <sup>3</sup> ) | 0.121                                                             | 0.561                                                             | 1.068                                                                                           |

<sup>a</sup>  $R = \sum_{hkl} (| |F_{obs}| - |F_{calc}| |) / \sum_{hkl} |F_{obs}|$ ;  $R_w = [\sum_{hkl} w (| |F_{obs}| - |F_{calc}| |)^2 / \sum_{hkl} w F_{obs}^2]^{1/2}$ ;  $w = 1/\sigma^2(F_{obs})$ ;  
 $GOF = [\sum_{hkl} w (| |F_{obs}| - |F_{calc}| |)^2 / (n_{data} - n_{vari})]^{1/2}$ .

## Compound 4

Table 2. Bond lengths [Å] and angles [deg] for 4.

---

|             |           |
|-------------|-----------|
| B(1)-C(32)  | 1.610(8)  |
| B(1)-C(1)   | 1.676(7)  |
| B(1)-C(28)  | 1.646(8)  |
| B(1)-C(32') | 1.632(18) |
| B(1)-C(30') | 1.661(18) |
| B(1)-C(30)  | 1.671(8)  |
| B(1)-C(28') | 1.725(16) |
| Li(1)-O(1)  | 1.93(3)   |
| Li(1)-O(3)  | 1.987(15) |
| Li(1)-O(1') | 2.05(2)   |
| Li(1)-O(2)  | 2.053(18) |
| Li(1)-O(2') | 2.02(3)   |
| Li(1)-C(3)  | 2.151(9)  |
| Li(1)-O(3') | 2.19(3)   |
| N(1)-C(1)   | 1.366(5)  |
| N(1)-C(2)   | 1.394(5)  |
| N(1)-C(16)  | 1.442(5)  |
| N(2)-C(1)   | 1.372(5)  |
| N(2)-C(3)   | 1.420(6)  |
| N(2)-C(4)   | 1.451(6)  |
| C(2)-C(3)   | 1.363(7)  |
| C(4)-C(5)   | 1.397(7)  |
| C(4)-C(9)   | 1.392(7)  |
| C(5)-C(6)   | 1.381(8)  |
| C(5)-C(13)  | 1.505(7)  |
| C(6)-C(7)   | 1.372(9)  |
| C(7)-C(8)   | 1.382(9)  |
| C(8)-C(9)   | 1.377(8)  |
| C(9)-C(10)  | 1.520(8)  |
| C(10)-C(11) | 1.514(8)  |
| C(10)-C(12) | 1.532(9)  |
| C(13)-C(14) | 1.532(8)  |
| C(13)-C(15) | 1.509(8)  |
| C(16)-C(21) | 1.388(6)  |
| C(16)-C(17) | 1.401(7)  |
| C(17)-C(18) | 1.386(8)  |
| C(17)-C(25) | 1.505(7)  |
| C(18)-C(19) | 1.360(9)  |
| C(19)-C(20) | 1.367(9)  |
| C(20)-C(21) | 1.388(7)  |
| C(21)-C(22) | 1.503(7)  |
| C(22)-C(23) | 1.512(8)  |
| C(22)-C(24) | 1.531(7)  |

|                    |           |
|--------------------|-----------|
| C(25)-C(26)        | 1.524(9)  |
| C(25)-C(27)        | 1.535(8)  |
| C(28)-C(29)        | 1.557(13) |
| C(30)-C(31)        | 1.513(10) |
| C(32)-C(33)        | 1.559(8)  |
| C(28')-C(29')      | 1.530(18) |
| C(30')-C(31')      | 1.534(17) |
| C(32')-C(33')      | 1.530(19) |
| O(1)-C(34)         | 1.40(3)   |
| O(1)-C(37)         | 1.41(3)   |
| C(34)-C(35)        | 1.39(2)   |
| C(35)-C(36)        | 1.26(2)   |
| C(36)-C(37)        | 1.43(2)   |
| O(1')-C(34')       | 1.41(2)   |
| O(1')-C(37')       | 1.43(3)   |
| C(34')-C(35')      | 1.379(17) |
| C(35')-C(36')      | 1.278(19) |
| C(36')-C(37')      | 1.439(19) |
| O(2)-C(38)         | 1.362(13) |
| O(2)-C(41)         | 1.433(14) |
| C(38)-C(39)        | 1.423(17) |
| C(39)-C(40)        | 1.305(18) |
| C(40)-C(41)        | 1.367(17) |
| O(2')-C(38')       | 1.37(2)   |
| O(2')-C(41')       | 1.43(2)   |
| C(38')-C(39')      | 1.39(2)   |
| C(39')-C(40')      | 1.32(3)   |
| C(40')-C(41')      | 1.35(3)   |
| O(3)-C(45)         | 1.322(15) |
| O(3)-C(42)         | 1.451(16) |
| C(42)-C(43)        | 1.542(18) |
| C(43)-C(44)        | 1.53(2)   |
| C(44)-C(45)        | 1.497(17) |
| O(3')-C(45')       | 1.34(3)   |
| O(3')-C(42')       | 1.48(2)   |
| C(42')-C(43')      | 1.53(3)   |
| C(43')-C(44')      | 1.55(3)   |
| C(44')-C(45')      | 1.50(3)   |
|                    |           |
| C(32)-B(1)-C(1)    | 112.3(4)  |
| C(32)-B(1)-C(28)   | 112.3(5)  |
| C(1)-B(1)-C(28)    | 109.6(4)  |
| C(1)-B(1)-C(32')   | 118.7(8)  |
| C(1)-B(1)-C(30')   | 111.9(9)  |
| C(32')-B(1)-C(30') | 113.4(13) |
| C(32)-B(1)-C(30)   | 110.6(5)  |
| C(1)-B(1)-C(30)    | 107.1(4)  |
| C(28)-B(1)-C(30)   | 104.5(4)  |
| C(1)-B(1)-C(28')   | 111.3(11) |
| C(32')-B(1)-C(28') | 103.1(14) |

|                    |           |
|--------------------|-----------|
| C(30')-B(1)-C(28') | 95.4(13)  |
| O(1)-Li(1)-O(3)    | 102.1(12) |
| O(1)-Li(1)-O(2)    | 93(3)     |
| O(3)-Li(1)-O(2)    | 105.6(8)  |
| O(1')-Li(1)-O(2')  | 110(2)    |
| O(1)-Li(1)-C(3)    | 112.8(15) |
| O(3)-Li(1)-C(3)    | 127.1(6)  |
| O(1')-Li(1)-C(3)   | 109.9(11) |
| O(2)-Li(1)-C(3)    | 110.8(6)  |
| O(2')-Li(1)-C(3)   | 114.4(11) |
| O(1')-Li(1)-O(3')  | 112.7(15) |
| O(2')-Li(1)-O(3')  | 87.4(12)  |
| C(3)-Li(1)-O(3')   | 120.2(12) |
| C(1)-N(1)-C(2)     | 110.4(4)  |
| C(1)-N(1)-C(16)    | 131.4(4)  |
| C(2)-N(1)-C(16)    | 118.2(4)  |
| C(1)-N(2)-C(3)     | 116.3(4)  |
| C(1)-N(2)-C(4)     | 126.1(4)  |
| C(3)-N(2)-C(4)     | 117.6(4)  |
| N(1)-C(1)-N(2)     | 101.7(4)  |
| N(1)-C(1)-B(1)     | 127.1(4)  |
| N(2)-C(1)-B(1)     | 131.2(4)  |
| C(3)-C(2)-N(1)     | 111.6(4)  |
| C(2)-C(3)-N(2)     | 99.9(4)   |
| C(2)-C(3)-Li(1)    | 122.8(5)  |
| N(2)-C(3)-Li(1)    | 137.3(4)  |
| C(5)-C(4)-C(9)     | 122.8(5)  |
| C(5)-C(4)-N(2)     | 118.6(4)  |
| C(9)-C(4)-N(2)     | 118.4(4)  |
| C(4)-C(5)-C(6)     | 116.6(5)  |
| C(4)-C(5)-C(13)    | 123.1(5)  |
| C(6)-C(5)-C(13)    | 120.3(5)  |
| C(7)-C(6)-C(5)     | 121.6(6)  |
| C(6)-C(7)-C(8)     | 120.6(6)  |
| C(9)-C(8)-C(7)     | 120.2(6)  |
| C(8)-C(9)-C(4)     | 118.2(5)  |
| C(8)-C(9)-C(10)    | 119.0(5)  |
| C(4)-C(9)-C(10)    | 122.9(5)  |
| C(9)-C(10)-C(11)   | 112.8(5)  |
| C(9)-C(10)-C(12)   | 111.6(5)  |
| C(11)-C(10)-C(12)  | 108.8(5)  |
| C(5)-C(13)-C(14)   | 112.5(5)  |
| C(5)-C(13)-C(15)   | 111.5(5)  |
| C(14)-C(13)-C(15)  | 109.8(5)  |
| C(21)-C(16)-C(17)  | 121.5(4)  |
| C(21)-C(16)-N(1)   | 119.3(4)  |
| C(17)-C(16)-N(1)   | 118.4(4)  |
| C(18)-C(17)-C(16)  | 118.0(5)  |
| C(18)-C(17)-C(25)  | 118.3(5)  |
| C(16)-C(17)-C(25)  | 123.6(5)  |

|                      |           |
|----------------------|-----------|
| C(17)-C(18)-C(19)    | 120.7(6)  |
| C(18)-C(19)-C(20)    | 120.9(5)  |
| C(21)-C(20)-C(19)    | 120.9(6)  |
| C(20)-C(21)-C(16)    | 117.9(5)  |
| C(20)-C(21)-C(22)    | 119.4(5)  |
| C(16)-C(21)-C(22)    | 122.7(4)  |
| C(21)-C(22)-C(23)    | 109.9(4)  |
| C(21)-C(22)-C(24)    | 112.8(5)  |
| C(23)-C(22)-C(24)    | 110.1(5)  |
| C(17)-C(25)-C(26)    | 110.9(5)  |
| C(17)-C(25)-C(27)    | 112.2(5)  |
| C(26)-C(25)-C(27)    | 110.6(6)  |
| C(29)-C(28)-B(1)     | 116.2(7)  |
| C(31)-C(30)-B(1)     | 118.3(6)  |
| C(33)-C(32)-B(1)     | 113.1(6)  |
| C(29')-C(28')-B(1)   | 113.7(18) |
| C(31')-C(30')-B(1)   | 116.1(17) |
| C(33')-C(32')-B(1)   | 117.9(16) |
| C(34)-O(1)-C(37)     | 96(3)     |
| C(34)-O(1)-Li(1)     | 118(2)    |
| C(37)-O(1)-Li(1)     | 136(3)    |
| O(1)-C(34)-C(35)     | 112.1(18) |
| C(36)-C(35)-C(34)    | 110(2)    |
| C(35)-C(36)-C(37)    | 104.1(19) |
| O(1)-C(37)-C(36)     | 112.5(17) |
| C(34')-O(1')-C(37')  | 103(2)    |
| C(34')-O(1')-Li(1)   | 120.8(14) |
| C(37')-O(1')-Li(1)   | 133.0(17) |
| O(1')-C(34')-C(35')  | 110.7(13) |
| C(36')-C(35')-C(34') | 106.4(17) |
| C(35')-C(36')-C(37') | 112.2(15) |
| O(1')-C(37')-C(36')  | 104.4(13) |
| C(38)-O(2)-C(41)     | 104.4(11) |
| C(38)-O(2)-Li(1)     | 131.2(12) |
| C(41)-O(2)-Li(1)     | 124.4(12) |
| O(2)-C(38)-C(39)     | 104.9(12) |
| C(40)-C(39)-C(38)    | 112.7(15) |
| C(41)-C(40)-C(39)    | 105.0(14) |
| C(40)-C(41)-O(2)     | 109.6(12) |
| C(38')-O(2')-C(41')  | 105(2)    |
| C(38')-O(2')-Li(1)   | 125(2)    |
| C(41')-O(2')-Li(1)   | 130(2)    |
| O(2')-C(38')-C(39')  | 109(2)    |
| C(40')-C(39')-C(38') | 109(2)    |
| C(41')-C(40')-C(39') | 109(2)    |
| C(40')-C(41')-O(2')  | 109(2)    |
| C(45)-O(3)-C(42)     | 109.1(10) |
| C(45)-O(3)-Li(1)     | 132.4(10) |
| C(42)-O(3)-Li(1)     | 118.5(11) |
| O(3)-C(42)-C(43)     | 105.7(12) |



|                      |           |
|----------------------|-----------|
| C(44)-C(43)-C(42)    | 100.5(13) |
| C(43)-C(44)-C(45)    | 106.7(13) |
| O(3)-C(45)-C(44)     | 109.1(12) |
| C(45')-O(3')-C(42')  | 108(2)    |
| C(45')-O(3')-Li(1)   | 116(2)    |
| C(42')-O(3')-Li(1)   | 135(2)    |
| O(3')-C(42')-C(43')  | 100(2)    |
| C(44')-C(43')-C(42') | 94(3)     |
| C(45')-C(44')-C(43') | 99(2)     |
| O(3')-C(45')-C(44')  | 108(2)    |

---

Symmetry transformations used to generate equivalent atoms:

## Compound 5

Table 3. Bond lengths [Å] and angles [deg] for **5**·THF.

---

|                   |            |
|-------------------|------------|
| Ga(1)-C(3)        | 1.978(3)   |
| Ga(1)-Cl(3)       | 2.1480(11) |
| Ga(1)-Cl(1)       | 2.1636(12) |
| Ga(1)-Cl(2)       | 2.1864(12) |
| N(1)-C(1)         | 1.321(4)   |
| N(1)-C(2)         | 1.380(4)   |
| N(1)-C(16)        | 1.457(3)   |
| N(2)-C(1)         | 1.330(4)   |
| N(2)-C(3)         | 1.404(4)   |
| N(2)-C(4)         | 1.457(4)   |
| C(2)-C(3)         | 1.350(4)   |
| C(4)-C(5)         | 1.387(5)   |
| C(4)-C(9)         | 1.388(5)   |
| C(5)-C(6)         | 1.399(6)   |
| C(5)-C(13)        | 1.510(6)   |
| C(6)-C(7)         | 1.337(7)   |
| C(7)-C(8)         | 1.360(7)   |
| C(8)-C(9)         | 1.420(5)   |
| C(9)-C(10)        | 1.514(6)   |
| C(10)-C(12)       | 1.536(5)   |
| C(10)-C(11)       | 1.528(6)   |
| C(13)-C(14)       | 1.533(6)   |
| C(13)-C(15)       | 1.528(6)   |
| C(16)-C(17)       | 1.398(4)   |
| C(16)-C(21)       | 1.386(4)   |
| C(17)-C(18)       | 1.388(5)   |
| C(17)-C(25)       | 1.515(5)   |
| C(18)-C(19)       | 1.368(5)   |
| C(19)-C(20)       | 1.360(5)   |
| C(20)-C(21)       | 1.387(4)   |
| C(21)-C(22)       | 1.518(5)   |
| C(22)-C(24)       | 1.523(5)   |
| C(22)-C(23)       | 1.523(5)   |
| C(25)-C(27)       | 1.486(6)   |
| C(25)-C(26)       | 1.513(7)   |
| O(1)-C(31)        | 1.393(6)   |
| O(1)-C(28)        | 1.399(7)   |
| C(28)-C(29)       | 1.445(9)   |
| C(29)-C(30)       | 1.415(9)   |
| C(30)-C(31)       | 1.469(8)   |
| C(3)-Ga(1)-Cl(3)  | 113.80(9)  |
| C(3)-Ga(1)-Cl(1)  | 114.33(9)  |
| Cl(3)-Ga(1)-Cl(1) | 106.92(5)  |

|                   |           |
|-------------------|-----------|
| C(3)-Ga(1)-Cl(2)  | 103.33(9) |
| Cl(3)-Ga(1)-Cl(2) | 109.21(6) |
| Cl(1)-Ga(1)-Cl(2) | 109.10(6) |
| C(1)-N(1)-C(2)    | 107.9(2)  |
| C(1)-N(1)-C(16)   | 126.0(2)  |
| C(2)-N(1)-C(16)   | 126.0(2)  |
| C(1)-N(2)-C(3)    | 109.6(2)  |
| C(1)-N(2)-C(4)    | 122.4(3)  |
| C(3)-N(2)-C(4)    | 128.0(2)  |
| N(1)-C(1)-N(2)    | 108.9(3)  |
| C(3)-C(2)-N(1)    | 109.4(3)  |
| C(2)-C(3)-N(2)    | 104.3(2)  |
| C(2)-C(3)-Ga(1)   | 124.3(2)  |
| N(2)-C(3)-Ga(1)   | 131.4(2)  |
| C(5)-C(4)-C(9)    | 124.8(3)  |
| C(5)-C(4)-N(2)    | 118.0(3)  |
| C(9)-C(4)-N(2)    | 117.2(3)  |
| C(4)-C(5)-C(6)    | 116.4(4)  |
| C(4)-C(5)-C(13)   | 123.5(3)  |
| C(6)-C(5)-C(13)   | 120.0(4)  |
| C(7)-C(6)-C(5)    | 120.6(5)  |
| C(6)-C(7)-C(8)    | 122.6(4)  |
| C(7)-C(8)-C(9)    | 120.5(4)  |
| C(4)-C(9)-C(8)    | 115.0(4)  |
| C(4)-C(9)-C(10)   | 123.1(3)  |
| C(8)-C(9)-C(10)   | 121.9(4)  |
| C(9)-C(10)-C(12)  | 113.8(4)  |
| C(9)-C(10)-C(11)  | 110.6(4)  |
| C(12)-C(10)-C(11) | 109.6(4)  |
| C(5)-C(13)-C(14)  | 112.8(4)  |
| C(5)-C(13)-C(15)  | 110.0(4)  |
| C(14)-C(13)-C(15) | 110.2(4)  |
| C(17)-C(16)-C(21) | 123.8(3)  |
| C(17)-C(16)-N(1)  | 118.1(3)  |
| C(21)-C(16)-N(1)  | 118.1(3)  |
| C(16)-C(17)-C(18) | 115.7(3)  |
| C(16)-C(17)-C(25) | 123.2(3)  |
| C(18)-C(17)-C(25) | 121.1(3)  |
| C(19)-C(18)-C(17) | 121.7(3)  |
| C(18)-C(19)-C(20) | 121.0(3)  |
| C(19)-C(20)-C(21) | 120.7(4)  |
| C(16)-C(21)-C(20) | 117.1(3)  |
| C(16)-C(21)-C(22) | 123.1(3)  |
| C(20)-C(21)-C(22) | 119.7(3)  |
| C(21)-C(22)-C(24) | 111.6(3)  |
| C(21)-C(22)-C(23) | 111.1(3)  |
| C(24)-C(22)-C(23) | 111.1(4)  |
| C(27)-C(25)-C(17) | 111.9(4)  |
| C(27)-C(25)-C(26) | 106.7(4)  |
| C(17)-C(25)-C(26) | 112.1(4)  |

|                   |          |
|-------------------|----------|
| C(31)-O(1)-C(28)  | 108.0(4) |
| O(1)-C(28)-C(29)  | 107.4(6) |
| C(28)-C(29)-C(30) | 107.1(6) |
| C(31)-C(30)-C(29) | 106.3(5) |
| O(1)-C(31)-C(30)  | 107.5(5) |

---

Symmetry transformations used to generate equivalent atoms:

## Compound 6

Table 4. Bond lengths [Å] and angles [deg] for compound **6**·(toluene)<sub>0.5</sub>.

---

|               |           |
|---------------|-----------|
| Ga(1)-C(1)    | 2.035(4)  |
| Ga(1)-Cl(3)   | 2.185(3)  |
| Ga(1)-Cl(1)   | 2.126(3)  |
| Ga(1)-Cl(2)   | 2.141(4)  |
| Ga(1')-Cl(1') | 2.189(10) |
| Ga(1')-C(1)   | 2.019(5)  |
| Ga(1')-Cl(2') | 2.154(11) |
| Ga(1')-Cl(3') | 2.100(10) |
| N(1)-C(1)     | 1.354(4)  |
| N(1)-C(2)     | 1.362(4)  |
| N(1)-C(16)    | 1.459(4)  |
| N(2)-C(1)     | 1.341(4)  |
| N(2)-C(3)     | 1.408(4)  |
| N(2)-C(4)     | 1.458(4)  |
| C(2)-C(3)     | 1.350(5)  |
| C(3)-B(1)     | 1.576(5)  |
| C(4)-C(9)     | 1.388(5)  |
| C(4)-C(5)     | 1.396(5)  |
| C(5)-C(6)     | 1.393(6)  |
| C(5)-C(13)    | 1.513(6)  |
| C(6)-C(7)     | 1.355(7)  |
| C(7)-C(8)     | 1.363(7)  |
| C(8)-C(9)     | 1.408(6)  |
| C(9)-C(10)    | 1.496(6)  |
| C(10)-C(11)   | 1.517(7)  |
| C(10)-C(12)   | 1.511(8)  |
| C(13)-C(14)   | 1.491(8)  |
| C(13)-C(15)   | 1.497(7)  |
| C(16)-C(21)   | 1.394(5)  |
| C(16)-C(17)   | 1.392(5)  |
| C(17)-C(18)   | 1.394(5)  |
| C(17)-C(25)   | 1.508(6)  |
| C(18)-C(19)   | 1.364(6)  |
| C(19)-C(20)   | 1.347(7)  |
| C(20)-C(21)   | 1.410(5)  |
| C(21)-C(22)   | 1.507(6)  |
| C(22)-C(24)   | 1.536(6)  |
| C(22)-C(23)   | 1.544(6)  |
| C(25)-C(27)   | 1.506(7)  |
| C(25)-C(26)   | 1.534(8)  |
| B(1)-C(31)    | 1.524(6)  |
| B(1)-C(29)    | 1.572(7)  |
| C(28)-C(29)   | 1.441(9)  |

|                      |            |
|----------------------|------------|
| C(30)-C(31)          | 1.503(6)   |
| C(32)-C(33)          | 1.3900     |
| C(32)-C(34)          | 1.3900     |
| C(32)-C(35)          | 1.466(16)  |
| C(33)-C(34A)         | 1.3900     |
| C(34A)-C(32A)        | 1.3900     |
| C(32A)-C(33A)        | 1.3900     |
| C(33A)-C(34)         | 1.3900     |
|                      |            |
| C(1)-Ga(1)-Cl(3)     | 104.61(16) |
| C(1)-Ga(1)-Cl(1)     | 113.03(15) |
| Cl(3)-Ga(1)-Cl(1)    | 108.53(15) |
| C(1)-Ga(1)-Cl(2)     | 111.9(2)   |
| Cl(3)-Ga(1)-Cl(2)    | 108.1(3)   |
| Cl(1)-Ga(1)-Cl(2)    | 110.4(2)   |
| Cl(1')-Ga(1')-C(1)   | 109.5(4)   |
| Cl(1')-Ga(1')-Cl(2') | 103.0(7)   |
| C(1)-Ga(1')-Cl(2')   | 115.9(5)   |
| Cl(1')-Ga(1')-Cl(3') | 107.6(6)   |
| C(1)-Ga(1')-Cl(3')   | 112.3(4)   |
| Cl(2')-Ga(1')-Cl(3') | 108.0(7)   |
| C(1)-N(1)-C(2)       | 109.9(3)   |
| C(1)-N(1)-C(16)      | 126.9(3)   |
| C(2)-N(1)-C(16)      | 122.9(3)   |
| C(1)-N(2)-C(3)       | 111.7(3)   |
| C(1)-N(2)-C(4)       | 125.1(3)   |
| C(3)-N(2)-C(4)       | 123.0(3)   |
| N(2)-C(1)-N(1)       | 105.2(3)   |
| N(2)-C(1)-Ga(1)      | 129.4(2)   |
| N(1)-C(1)-Ga(1)      | 125.0(2)   |
| N(2)-C(1)-Ga(1')     | 129.6(2)   |
| N(1)-C(1)-Ga(1')     | 125.2(2)   |
| N(1)-C(2)-C(3)       | 109.6(3)   |
| C(2)-C(3)-N(2)       | 103.6(3)   |
| C(2)-C(3)-B(1)       | 125.5(3)   |
| N(2)-C(3)-B(1)       | 130.9(3)   |
| C(9)-C(4)-C(5)       | 124.7(3)   |
| C(9)-C(4)-N(2)       | 118.7(3)   |
| C(5)-C(4)-N(2)       | 116.5(3)   |
| C(6)-C(5)-C(4)       | 116.2(4)   |
| C(6)-C(5)-C(13)      | 120.5(4)   |
| C(4)-C(5)-C(13)      | 123.4(3)   |
| C(7)-C(6)-C(5)       | 121.1(5)   |
| C(6)-C(7)-C(8)       | 121.3(4)   |
| C(7)-C(8)-C(9)       | 121.5(5)   |
| C(4)-C(9)-C(8)       | 115.1(4)   |
| C(4)-C(9)-C(10)      | 123.7(4)   |
| C(8)-C(9)-C(10)      | 121.2(4)   |
| C(9)-C(10)-C(11)     | 111.5(5)   |
| C(9)-C(10)-C(12)     | 112.3(5)   |

|                      |           |
|----------------------|-----------|
| C(11)-C(10)-C(12)    | 109.1(6)  |
| C(14)-C(13)-C(15)    | 109.2(6)  |
| C(14)-C(13)-C(5)     | 111.5(5)  |
| C(15)-C(13)-C(5)     | 114.0(5)  |
| C(21)-C(16)-C(17)    | 124.5(3)  |
| C(21)-C(16)-N(1)     | 118.7(3)  |
| C(17)-C(16)-N(1)     | 116.8(3)  |
| C(16)-C(17)-C(18)    | 116.2(4)  |
| C(16)-C(17)-C(25)    | 123.3(3)  |
| C(18)-C(17)-C(25)    | 120.4(4)  |
| C(19)-C(18)-C(17)    | 121.0(4)  |
| C(20)-C(19)-C(18)    | 121.6(4)  |
| C(19)-C(20)-C(21)    | 121.4(4)  |
| C(16)-C(21)-C(20)    | 115.3(4)  |
| C(16)-C(21)-C(22)    | 123.1(3)  |
| C(20)-C(21)-C(22)    | 121.6(4)  |
| C(24)-C(22)-C(21)    | 113.1(4)  |
| C(24)-C(22)-C(23)    | 109.7(4)  |
| C(21)-C(22)-C(23)    | 110.3(3)  |
| C(17)-C(25)-C(27)    | 110.7(4)  |
| C(17)-C(25)-C(26)    | 112.2(5)  |
| C(27)-C(25)-C(26)    | 109.8(5)  |
| C(31)-B(1)-C(3)      | 124.2(4)  |
| C(31)-B(1)-C(29)     | 119.9(4)  |
| C(3)-B(1)-C(29)      | 115.8(4)  |
| C(28)-C(29)-B(1)     | 106.4(6)  |
| B(1)-C(31)-C(30)     | 121.1(5)  |
| C(33)-C(32)-C(34)    | 120.0     |
| C(33)-C(32)-C(35)    | 121.0(15) |
| C(34)-C(32)-C(35)    | 118.9(15) |
| C(34A)-C(33)-C(32)   | 120.0     |
| C(33)-C(34A)-C(32A)  | 120.0     |
| C(34A)-C(32A)-C(33A) | 120.0     |
| C(32A)-C(33A)-C(34)  | 120.0     |
| C(33A)-C(34)-C(32)   | 120.0     |

---

Symmetry transformations used to generate equivalent atoms:

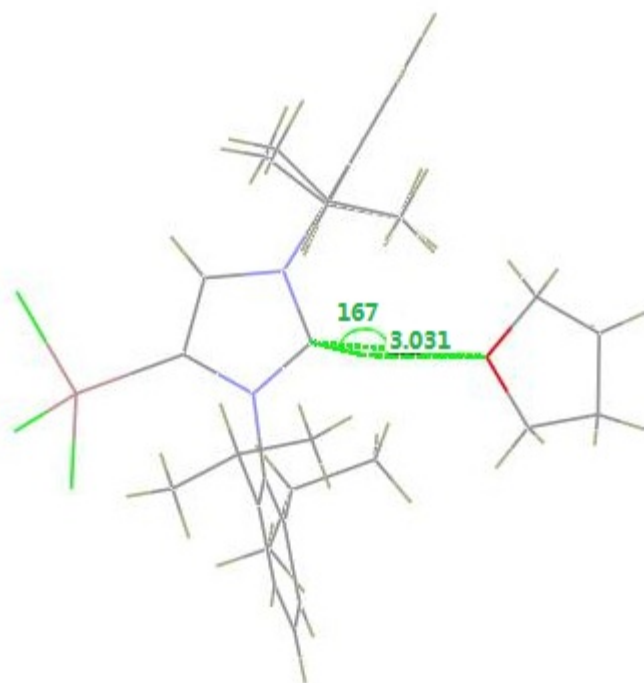

Figure 1. A moderate C-H...O hydrogen bond [distance (C...O) = 3.031 Å; C-H...O bond angle = 167°] between the C(1)-H(1A) unit of **5** and the O atom of THF solvent molecule.
